# Supplementary material for: A novel serum based biomarker panel has complementary ability to preclude presence of early lung cancer for low dose CT (LDCT)
Source: PubMed Central journal article supplement (PMC5542191; doi:10.18632/oncotarget.17477), 2017-04-27
Supplement: oncotarget-08-45345-s001.pdf [file oncotarget-08-45345-s001.pdf]

# A novel serum based biomarker panel has complementary ability to preclude presence of early lung cancer for low dose CT (LDCT)

## Supplementary Materials

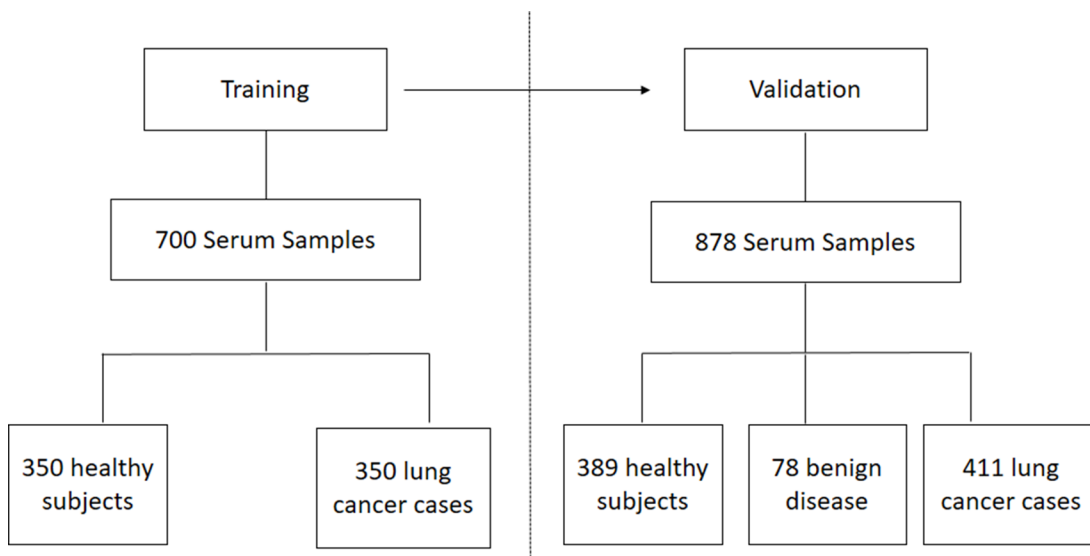

Supplementary Figure 1: The research design for the characterization and validation of serum MIC-1 and its combination in the diagnosis of Lung cancer (flow chart).

**Supplementary Table 1: Statistics of each marker in healthy, benign and cancer patients of both training group and validation group**

| Marker    | Group            | Training group |       |        |        |        |       | Validation group |       |        |        |        |       |
|-----------|------------------|----------------|-------|--------|--------|--------|-------|------------------|-------|--------|--------|--------|-------|
|           |                  | #              | min   | max    | median | mean   | IQR   | #                | min   | max    | median | mean   | IQR   |
| MIC-1     | stage I/II       | 155            | 319.3 | 3618   | 1272.9 | 1310.1 | 712.4 | 199              | 195.2 | 5759   | 1324.5 | 1434.7 | 788   |
|           | All cases        | 350            | 196.6 | 5292.4 | 1321   | 1458   | 726.5 | 411              | 126   | 5759   | 1367.9 | 1541.1 | 815.2 |
|           | benign condition |                |       |        |        |        |       | 78               | 290.3 | 3754.5 | 884.7  | 996    | 529.7 |
|           | healthy control  | 350            | 21    | 2398.9 | 348.2  | 397.2  | 147.4 | 389              | 23    | 2071.7 | 363.8  | 423.7  | 215.8 |
| Cyfra21-1 | stage I/II       | 155            | 0.7   | 27.8   | 2.4    | 3.6    | 2.1   | 199              | 0.4   | 24     | 2.7    | 3.2    | 1.9   |
|           | All cases        | 350            | 0.7   | 793    | 3.1    | 8.1    | 3.2   | 411              | 0.4   | 106.9  | 3.2    | 6      | 3.7   |
|           | benign condition |                |       |        |        |        |       | 78               | 0.4   | 3.9    | 1.8    | 1.9    | 1.1   |
|           | healthy control  | 350            | 0.3   | 8.6    | 1.5    | 1.6    | 1.1   | 389              | 0.3   | 9.6    | 1.6    | 1.6    | 0.7   |
| NSE       | stage I/II       | 155            | 7.3   | 84.2   | 12     | 13.1   | 3.9   | 199              | 2.9   | 51.1   | 11.8   | 12.6   | 3.3   |
|           | All cases        | 350            | 1.8   | 124.1  | 13.3   | 17.8   | 5.6   | 411              | 2.9   | 370    | 13.1   | 18.5   | 6.2   |
|           | benign condition |                |       |        |        |        |       | 78               | 7.3   | 18     | 11.3   | 11.9   | 2.7   |
|           | healthy control  | 350            | 4.6   | 39.2   | 9.3    | 10.2   | 3.9   | 389              | 5.3   | 47.9   | 10.2   | 10.6   | 3.2   |
| CA125     | stage I/II       | 155            | 2.7   | 113.6  | 11.8   | 15.8   | 8.1   | 199              | 1     | 309.5  | 12.1   | 19.6   | 9.9   |
|           | All cases        | 350            | 2.7   | 3390   | 16.6   | 50.5   | 27    | 411              | 1     | 7138   | 15.9   | 84.8   | 28.3  |
|           | benign condition |                |       |        |        |        |       | 78               | 3.3   | 103.1  | 11.3   | 15.1   | 8.4   |
|           | healthy control  | 350            | 0.5   | 79.2   | 8.1    | 10.4   | 7.6   | 389              | 0.5   | 110.2  | 10     | 12     | 6.9   |
| CEA       | stage I/II       | 155            | 0.3   | 114.2  | 2.8    | 6.3    | 2.7   | 199              | 0.3   | 30.4   | 2.7    | 3.7    | 2.5   |
|           | All cases        | 350            | 0.3   | 1437   | 3.3    | 29.3   | 7.7   | 411              | 0.2   | 2115   | 3.5    | 38.9   | 7.2   |
|           | benign condition |                |       |        |        |        |       | 78               | 0.3   | 58.2   | 1.7    | 2.9    | 1.8   |
|           | healthy control  | 350            | 0.2   | 15.9   | 1.7    | 2      | 1.6   | 389              | 0.2   | 16.7   | 1.7    | 2.1    | 1.5   |
| SCC       | stage I/II       | 155            | 0.1   | 24.9   | 0.8    | 1.4    | 0.5   | 199              | 0.3   | 12.1   | 0.9    | 1.4    | 0.7   |
|           | All cases        | 350            | 0.1   | 32.4   | 0.8    | 1.7    | 0.7   | 411              | 0.2   | 70     | 1      | 2.1    | 0.8   |
|           | benign condition |                |       |        |        |        |       | 78               | 0.3   | 4.4    | 0.8    | 0.9    | 0.4   |
|           | healthy control  | 350            | 0.1   | 3.4    | 0.6    | 0.7    | 0.4   | 389              | 0.1   | 3.4    | 0.6    | 0.6    | 0.4   |

**Supplementary Table 2: Sensitivity and specificity of MIC-1 in lung cancer patients**

| Specificity | Sensitivity (training set ) |           |                            |            | Sensitivity (validation set ) |           |                            |           |
|-------------|-----------------------------|-----------|----------------------------|------------|-------------------------------|-----------|----------------------------|-----------|
|             | All cases Versus Healthy    |           | Early stage Versus Healthy |            | All cases Versus healthy      |           | Early stage Versus Healthy |           |
|             | Estimate                    | 95% CI    | Estimate                   | 95% CI     | Estimate                      | 95% CI    | Estimate                   | 95% CI    |
| 0.99        | 0.440                       | 38.7–49.4 | 0.381                      | 30.4–46.2  | 0.397                         | 34.9–44.6 | 0.362                      | 29.5–43.3 |
| 0.97        | 0.709                       | 87.7–93.9 | 0.665                      | 58.4–73.8  | 0.672                         | 62.4–71.7 | 0.628                      | 55.7–69.5 |
| 0.95        | 0.849                       | 80.7–88.4 | 0.794                      | 72.1–85.4  | 0.844                         | 80.6–87.8 | 0.839                      | 78.1–88.7 |
| 0.90        | 0.911                       | 87.7–93.9 | 0.890                      | 83.0–93.5  | 0.891                         | 85.6–91.9 | 0.879                      | 82.6–92.1 |
| 0.80        | 0.963                       | 93.7–98.0 | 0.942                      | 89.3–97.3  | 0.939                         | 91.2–96.0 | 0.930                      | 88.5–96.1 |
| 0.70        | 0.974                       | 95.2–98.8 | 0.961                      | 91.8–98.6  | 0.966                         | 94.4–98.1 | 0.975                      | 94.2–99.2 |
| 0.60        | 0.983                       | 96.3–99.4 | 0.968                      | 92.6–98.9  | 0.973                         | 95.3–98.7 | 0.985                      | 95.7–99.7 |
| 0.50        | 0.994                       | 98.0–99.9 | 0.994                      | 96.5–100.0 | 0.985                         | 96.8–99.5 | 0.990                      | 96.4–99.9 |

**Supplementary Table 3: Performances of MIC-1, Cyfra21-1, NSE, CA125, CEA and SCC for diagnosis of lung cancer**

|                                                              | Training set           |                 |                 | Validation set         |                 |                 |
|--------------------------------------------------------------|------------------------|-----------------|-----------------|------------------------|-----------------|-----------------|
|                                                              | AUC (95% CI)           | Sensitivity (%) | Specificity (%) | AUC (95% CI)           | Sensitivity (%) | Specificity (%) |
| <b>all LC vs Healthy control</b>                             |                        |                 |                 |                        |                 |                 |
| MIC-1                                                        | 0.962 (0.945–0.975)    | 72.2            | 96.6            | 0.952 (0.935–0.966)    | 69.3            | 96.9            |
| Cyfra21-1                                                    | 0.847 (0.818–0.873)*** | 46.6            | 96.6            | 0.872 (0.847–0.895)*** | 48.7            | 96.9            |
| NSE                                                          | 0.806 (0.775–0.835)*** | 20.0            | 97.7            | 0.770 (0.739–0.798)*** | 18.7            | 99.2            |
| CA125                                                        | 0.787 (0.755–0.817)*** | 26.6            | 98.0            | 0.720 (0.688–0.751)*** | 25.8            | 97.9            |
| CEA                                                          | 0.756 (0.723–0.788)*** | 37.7            | 96.0            | 0.760 (0.729–0.789)*** | 36.3            | 95.9            |
| SCC                                                          | 0.682 (0.646–0.716)*** | 21.1            | 96.3            | 0.754 (0.723–0.784)*** | 26.3            | 96.6            |
| <b>Early stage LC (stage I &amp; II) vs Healthy control</b>  |                        |                 |                 |                        |                 |                 |
| MIC-1                                                        | 0.953 (0.931–0.970)    | 67.1            | 96.6            | 0.953 (0.933–0.969)    | 65.3            | 96.9            |
| Cyfra21-1                                                    | 0.798 (0.760–0.832)*** | 34.2            | 96.6            | 0.808 (0.774–0.839)*** | 31.2            | 96.9            |
| NSE                                                          | 0.741 (0.700–0.779)*** | 6.5             | 97.7            | 0.677 (0.637–0.715)*** | 3.5             | 99.2            |
| CA125                                                        | 0.689 (0.646–0.729)*** | 5.8             | 98.0            | 0.616 (0.575–0.655)*** | 9.5             | 97.9            |
| CEA                                                          | 0.684 (0.642–0.725)*** | 20.6            | 96.0            | 0.688 (0.649–0.725)*** | 17.6            | 95.9            |
| SCC                                                          | 0.669 (0.626–0.709)*** | 15.5            | 96.3            | 0.739 (0.702–0.774)*** | 20.6            | 96.6            |
| <b>Early stage LC (stage I &amp; II) vs Benign condition</b> |                        |                 |                 |                        |                 |                 |
| MIC-1                                                        |                        |                 |                 | 0.692 (0.634–0.746)    | 65.3            | 62.8            |
| Cyfra21-1                                                    |                        |                 |                 | 0.724 (0.668–0.776)    | 31.2            | 97.4            |
| NSE                                                          |                        |                 |                 | 0.525 (0.464–0.585)*** | 3.5             | 100             |
| CA125                                                        |                        |                 |                 | 0.533 (0.473–0.594)**  | 9.5             | 96.2            |
| CEA                                                          |                        |                 |                 | 0.665 (0.606–0.720)    | 17.6            | 93.6            |
| SCC                                                          |                        |                 |                 | 0.601 (0.540–0.659)*   | 20.6            | 89.7            |

\* $p < 0.05$ , \*\* $p < 0.01$ , \*\*\* $p < 0.001$  in comparison to MIC-1.

**Supplementary Table 4: ROC curve analysis in different histological subtypes**

| histological subtypes  | Training group |             | Validation group |             |
|------------------------|----------------|-------------|------------------|-------------|
|                        | AUC            | 95% CI      | AUC              | 95% CI      |
| NSCLC <sub>(scc)</sub> | 0.965          | 0.945–0.980 | 0.949            | 0.927–0.967 |
| NSCLC <sub>(ca)</sub>  | 0.959          | 0.938–0.974 | 0.951            | 0.931–0.966 |
| SCLC                   | 0.968          | 0.945–0.983 | 0.958            | 0.934–0.975 |

scc: Squamous cell carcinomas; ca: denocarcinoma.

**Supplementary Table 5: Multivariable logistic analyses for serum biomarkers and various diagnostic factors in patients with lung cancer**

| Variable            | Odds Ratio | 95% CI      | P       |
|---------------------|------------|-------------|---------|
| Age, > 60 y vs ≤ 60 | 1.978      | 0.795–4.918 | 0.142   |
| Sex, female vs male | 1.669      | 0.855–3.261 | 0.134   |
| MIC1                | 1.006      | 1.004–1.007 | < 0.001 |
| Cyfra21-1           | 1.902      | 1.493–2.422 | < 0.001 |
| CA125               | 1.034      | 1.010–1.059 | 0.006   |
| CEA                 | 1.129      | 0.996–1.280 | 0.058   |
| NSE                 | 1.066      | 1.000–1.136 | 0.051   |
| SCC                 | 1.107      | 0.620–1.977 | 0.732   |

**Supplementary Table 6: AUC and sensitivities of different panels for diagnosis of lung cancer at 95% specificity in the training group**

| Marker                        | All cases           |                    | Early-stage cases   |                    |
|-------------------------------|---------------------|--------------------|---------------------|--------------------|
|                               | AUC(95%CI)          | sensitivity(95%CI) | AUC(95%CI)          | sensitivity(95%CI) |
| MIC-1                         | 0.962 (0.945–0.975) | 84.9% (80.7–88.4%) | 0.953 (0.931–0.970) | 79.4% (72.1–85.4%) |
| MIC-1+Cyfra21-1               | 0.974 (0.959–0.984) | 86.9% (82.9–90.2%) | 0.961 (0.941–0.976) | 81.3% (74.2–87.1%) |
| MIC-1+Cyfra21-1+CA125         | 0.976 (0.961–0.986) | 88.9% (85.1–92.0%) | 0.963 (0.943–0.978) | 82.6% (75.7–88.2%) |
| MIC-1+Cyfra21-1+NSE           | 0.975 (0.961–0.985) | 87.7% (83.8–91.0%) | 0.962 (0.942–0.977) | 81.3% (74.2–87.1%) |
| MIC-1+Cyfra21-1+CEA           | 0.974 (0.960–0.985) | 87.4% (83.5–90.7%) | 0.961 (0.940–0.976) | 81.3% (74.2–87.1%) |
| MIC-1+Cyfra21-1+CA125+NSE     | 0.977 (0.963–0.987) | 88.0% (84.1–91.2%) | 0.963 (0.943–0.978) | 80.7% (73.5–86.5%) |
| MIC-1+Cyfra21-1+CA125+CEA     | 0.976 (0.962–0.986) | 90.6% (87.0–93.4%) | 0.962 (0.941–0.977) | 83.9% (82.3–93.0%) |
| MIC-1+Cyfra21-1+CEA+NSE       | 0.976 (0.961–0.986) | 88.6% (84.8–91.7%) | 0.961 (0.941–0.976) | 81.9% (75.0–87.6%) |
| MIC-1+Cyfra21-1+CA125+NSE+CEA | 0.978 (0.959–0.984) | 89.7% (86.0–92.7%) | 0.963 (0.942–0.977) | 82.6% (75.7–88.2%) |

**Supplementary Table 7: STARD checklist for reporting of studies of diagnostic accuracy. See Supplementary\_Table\_7**
